# Supplementary material
Source: PubMed Central journal article supplement (PMC2657429)
Supplement: 0813371106_0813371106SI.pdf [file 0813371106_0813371106SI.pdf]

# Supporting Information

Wang et al. 10.1073/pnas.0813371106

## SI Text

**Materials and Methods. Animals and the animal model.** Six-month-old male Balb/C mice were fasted for 24 h before a single i.p. injection of either varying concentrations of acetaminophen in PBS (treatment group) or PBS (control group). Mice were euthanized at different time points after exposure; plasma (with EDTA as anticoagulant) and liver samples were collected for pathological examination and biochemical analyses.

To assess the tissue damage induced by acetaminophen overdose, the sections of liver tissues from treated and control animals were examined by a pathologist, and the ALT level was also determined in plasma obtained from the same animal by using a standard end-point colorimetric assay kit (TECO Diagnostics).

**RNA isolation from plasma.** Total RNA, including miRNA from plasma, was isolated by using the miRNeasy kit (Qiagen) with minor modifications (S. Zhang and K. Wang, unpublished work). In brief, 700  $\mu\text{L}$  of QIAzol reagent was added to 200  $\mu\text{L}$  of plasma sample. The sample was mixed in a tube, followed by the addition of 3  $\mu\text{L}$  of miSPIKE, spiked-in miRNA, at a concentration of 0.1  $\mu\text{M}$  (IDT) and 140  $\mu\text{L}$  of chloroform. After mixing vigorously for 15 s, the sample was then centrifuged at  $12,000 \times g$  for 15 min. The upper aqueous phase was carefully transferred to a new collection tube, and 1.5 vol of ethanol were added. The sample was then applied directly to a silica membrane containing column and the RNA was bound and cleaned by using buffers provided by the manufacturer to remove impurities. The immobilized RNA was then collected from the membrane with a low salt elution buffer. The quality and quantity of the RNA was evaluated by 260/280 ratio and Agilent 2100 Bioanalyzer (Agilent Technologies). The efficiency of small RNA isolation is monitored by the amount of spiked-in miRNA recovered by using PCR with sequence specific primers (IDT).

**Array hybridization and data analyses.** To assess the level and composition of miRNA, miRNA arrays from Agilent Technologies were used. The RNA samples were labeled and processed according to manufacturer's recommended protocols. In brief,  $\approx 100$  ng of total RNA was dephosphorylated with calf intestinal alkaline phosphatase, followed by denaturing with heat in the presence of dimethyl sulfoxide (DMSO). A cyanine dye, cyanine 3-cytidine bisphosphate (pCp), was then joined to the dephosphorylated single-stranded RNA (including miRNA) by T4 RNA ligase. MicroBioSpin 6 columns (Bio-Rad) were used to remove any unincorporated cyanine dye from the samples. The purified labeled miRNA probes were hybridized to  $8 \times 15$  K mouse miRNA microarrays in a rotating hybridization oven at 10 rpm for 20 h at 55  $^{\circ}\text{C}$ . After hybridization, the arrays were washed in Agilent GE Wash Buffer 1 with Triton X-102, followed by Agilent GE Wash Buffer 2 with Triton X-102. After washing, all slides were immediately scanned at 5- $\mu\text{m}$  resolution by using a PerkinElmer ScanArray Express array scanner. The resulting images were quantified by using Agilent's Feature Extraction software. The differentially expressed miRNAs were identified by using a standard protocol developed for mRNA

gene arrays. To increase the reliability of the data and the ease of detection, miRNA species with hybridization intensities  $< 1.5$  times the average hybridization intensity (mean) were excluded from analysis. The miRNA clustering analysis was performed with the Hierarchical clustering algorithm provided in MultiExperiment Viewer, MeV4.0 software package ([www.tm4.org/mev.html](http://www.tm4.org/mev.html)).

**Real-time quantitative RT-PCR analysis.** The expression levels of miRNA were confirmed with a SYBR-based quantitative PCR (QPCR) using individual miRNA-specific primers (Qiagen). The first-strand miRNA-cDNA PCR template was generated from  $\approx 50$  ng of total RNA according to the manufacturer's instructions. Approximately 2.5 ng of cDNA was then used in the PCR. The PCR product that corresponded to the specific miRNA species was first confirmed on a 6% polyacrylamide gel. The level of specific miRNA based on SYBR green intensity was then monitored with the 7900HT real-time PCR system from Applied Biosystems. The QPCR results were analyzed by SDS 2.2.2.

**Results. Significant elevation of plasma RNA quantity in acetaminophen-overdosed mice.** The amount of total RNA isolated from control and 24 h after acetaminophen-overdosed liver samples were similar, ranging from 150  $\mu\text{g}$  to 300  $\mu\text{g}$  from  $\approx 100$  mg of tissue. However, the amount of RNA isolated from plasma was quite different between control and treated samples. In the control samples, the amount of total RNA obtained ranged from 0.2 to 0.5  $\mu\text{g}$  from 200  $\mu\text{L}$  of plasma. The plasma from 24 h after acetaminophen-overdosed animals provided 2–18  $\mu\text{g}$  of RNA from 200  $\mu\text{L}$  of plasma, a 10- to 30-fold increase of the RNA in the plasma.

**Direct correlation between plasma RNA levels with tissue injury.** In addition to proteins, it has been reported that plasma contains significant levels of nucleic acids including DNA and RNA. It has long been believed that DNA and RNA as well as some of the intracellular proteins such as lactate dehydrogenase (LDH), ALT, and AST appear in the plasma as a result of cell death through normal physiological renewal as well as necrotic or apoptotic processes occurring in various pathological conditions. The level of circulating DNA and liver-specific RNA have been suggested as good indicators for drug-induced tissue injury. In our study, we also observed a gradual increase of RNA in plasma with the progression of tissue injuries induced by acetaminophen. At 24 h after acetaminophen exposure, the amount of plasma RNA showed an increase as high as 70-fold (from  $\approx 0.2$  to 0.3  $\mu\text{g}$  from 200  $\mu\text{L}$  of control plasma samples to as high as 18  $\mu\text{g}$  in drug-overdosed plasma samples). At the same time point, the ALT level, a well-established indicator for hepatocyte injury, was increased by 360-fold, which suggests that the loss of cellular integrity makes a significant contribution to the increase of plasma RNA levels (Fig. S3). The circulating RNA concentration by itself may be a good indicator for drug-induced tissue injury, but lack of specificity makes it unlikely to be as informative as changes in specific miRNA levels in the plasma.

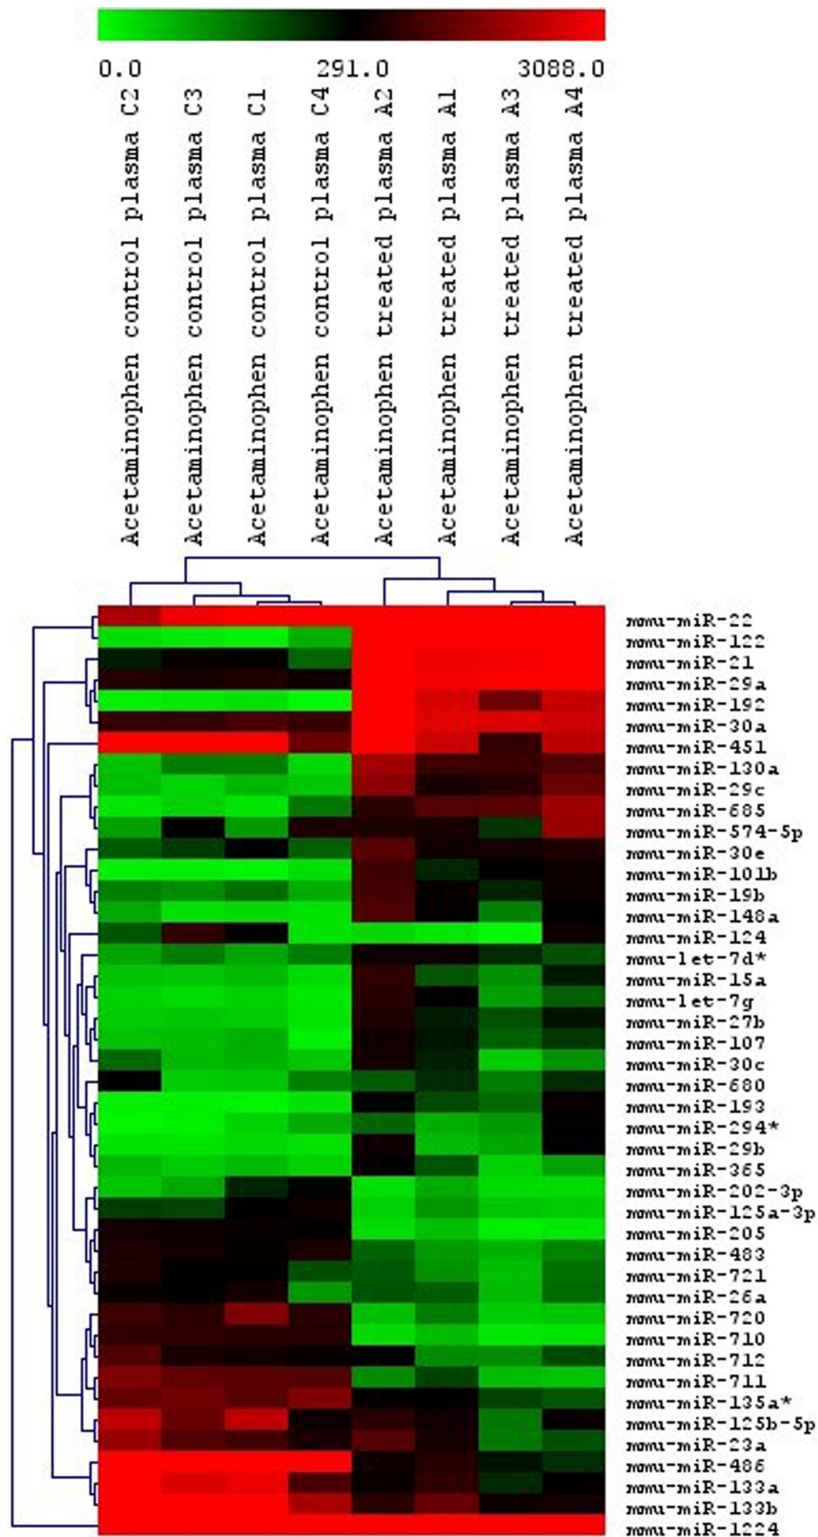

**Fig. S1.** Cluster analysis of plasma miRNAs. Cluster analysis of 44 miRNAs that showed a >2-fold change between control and acetaminophen-overdosed plasma samples. The progressively brighter shades of red indicate a gradual increase of the miRNA concentration, whereas the shades of green indicate a gradual decrease of miRNA expression levels. The identities of miRNAs are listed on the right, whereas the sample names are on the top.

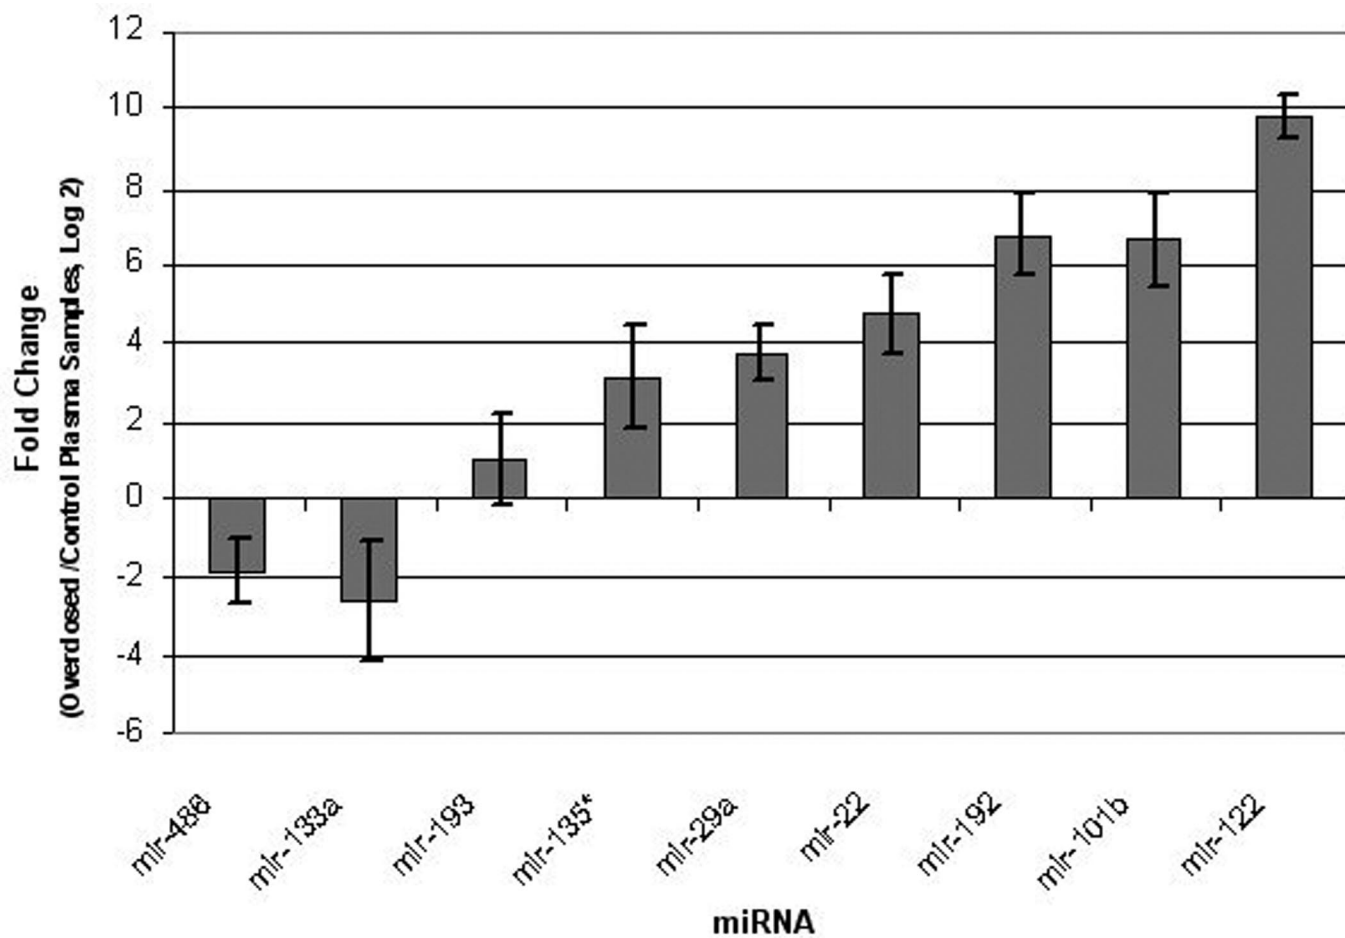

Fig. S2. Confirmation of differentially expressed miRNA species in plasma by QPCR. The identities of miRNA species used in QPCR are indicated. Results are shown as log<sub>2</sub> of the ratio of the mean of 4 independent overdosed plasma samples and the mean of 4 independent control plasmas. The standard deviations are shown as error bars.

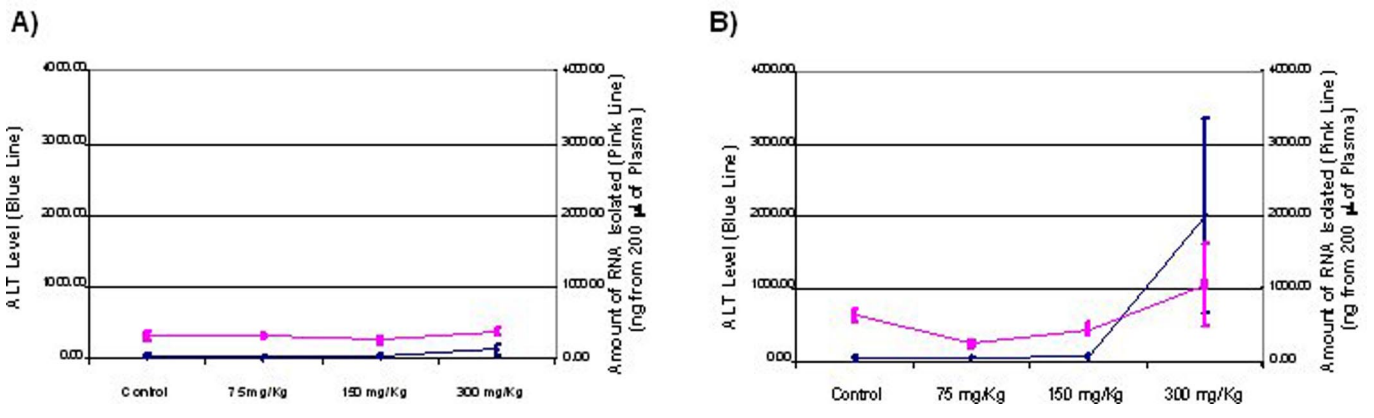

**Fig. S3.** Amount of RNA isolated from plasma correlates well with the ALT levels. The trends between the amount of RNA isolated from 200  $\mu$ L of plasma (pink line) and the ALT (blue line) levels from samples collected from mice 1 (A) and 3 (B) h after exposed to different doses of acetaminophen (indicated on x axis) are similar.

**Table S1. Detectable miRNAs in the liver and plasma by microarray**

| Liver tissues       |                     | Plasma samples         |                        |
|---------------------|---------------------|------------------------|------------------------|
| Control             | Treated             | Control                | Treated                |
| mmu-let-7b          | mghv-miR-M1-2       | <b>mmu-let-7b</b>      | <b>mmu-let-7b</b>      |
| mmu-let-7c          | mmu-let-7d*         | <b>mmu-let-7c</b>      | <b>mmu-let-7c</b>      |
| mmu-miR-101b        | <b>mmu-miR-122</b>  | <b>mmu-miR-1224</b>    | mmu-let-7d*            |
| <b>mmu-miR-122</b>  | <b>mmu-miR-1224</b> | mmu-miR-124            | mmu-let-7 g            |
| <b>mmu-miR-1224</b> | mmu-miR-188-5p      | mmu-miR-125a-3p        | mmu-miR-1              |
| mmu-miR-130a        | mmu-miR-197         | <b>mmu-miR-125b-5p</b> | mmu-miR-101b           |
| mmu-miR-15a         | mmu-miR-207         | <b>mmu-miR-133a</b>    | mmu-miR-106b           |
| mmu-miR-192         | <b>mmu-miR-21</b>   | <b>mmu-miR-133b</b>    | mmu-miR-107            |
| mmu-miR-193         | <b>mmu-miR-22</b>   | <b>mmu-miR-135a*</b>   | mmu-miR-122            |
| mmu-miR-194         | mmu-miR-297a        | <b>mmu-miR-140*</b>    | <b>mmu-miR-1224</b>    |
| mmu-miR-19b         | mmu-miR-297b-3p     | <b>mmu-miR-16</b>      | <b>mmu-miR-124</b>     |
| <b>mmu-miR-21</b>   | <b>mmu-miR-29a</b>  | <b>mmu-miR-188-5p</b>  | <b>mmu-miR-125b-5p</b> |
| mmu-miR-212         | <b>mmu-miR-30a</b>  | mmu-miR-199b           | mmu-miR-130a           |
| <b>mmu-miR-22</b>   | mmu-miR-328         | mmu-miR-202-3p         | <b>mmu-miR-133a</b>    |
| mmu-miR-26a         | mmu-miR-466c-5p     | mmu-miR-205            | <b>mmu-miR-133b</b>    |
| <b>mmu-miR-29a</b>  | mmu-miR-466d-3p     | <b>mmu-miR-21</b>      | <b>mmu-miR-135a*</b>   |
| mmu-miR-29b         | mmu-miR-466f-3p     | <b>mmu-miR-22</b>      | <b>mmu-miR-140*</b>    |
| mmu-miR-29c         | mmu-miR-466 g       | <b>mmu-miR-223</b>     | mmu-miR-148a           |
| <b>mmu-miR-30a</b>  | mmu-miR-466 h       | <b>mmu-miR-23a</b>     | mmu-miR-15a            |
| mmu-miR-30e         | mmu-miR-467a*       | <b>mmu-miR-24</b>      | <b>mmu-miR-16</b>      |
| mmu-miR-487b        | mmu-miR-467b*       | <b>mmu-miR-25</b>      | <b>mmu-miR-188-5p</b>  |
| <b>mmu-miR-494</b>  | mmu-miR-467e*       | mmu-miR-26a            | mmu-miR-192            |
| <b>mmu-miR-720</b>  | mmu-miR-468         | <b>mmu-miR-29a</b>     | mmu-miR-193            |
|                     | mmu-miR-483         | <b>mmu-miR-30a</b>     | mmu-miR-19b            |
|                     | mmu-miR-483*        | <b>mmu-miR-30d</b>     | <b>mmu-miR-21</b>      |
|                     | mmu-miR-485*        | mmu-miR-328            | <b>mmu-miR-22</b>      |
|                     | <b>mmu-miR-494</b>  | <b>mmu-miR-378</b>     | <b>mmu-miR-223</b>     |
|                     | mmu-miR-574-3p      | <b>mmu-miR-451</b>     | <b>mmu-miR-23a</b>     |
|                     | mmu-miR-574-5p      | mmu-miR-483            | <b>mmu-miR-24</b>      |
|                     | mmu-miR-669a        | <b>mmu-miR-486</b>     | <b>mmu-miR-25</b>      |
|                     | mmu-miR-669c        | <b>mmu-miR-574-5p</b>  | mmu-miR-27a            |
|                     | mmu-miR-671-5p      | <b>mmu-miR-671-5p</b>  | mmu-miR-27b            |
|                     | mmu-miR-672         | mmu-miR-680            | mmu-miR-294*           |
|                     | mmu-miR-689         | <b>mmu-miR-689</b>     | <b>mmu-miR-29a</b>     |
|                     | mmu-miR-709         | <b>mmu-miR-709</b>     | mmu-miR-29b            |
|                     | mmu-miR-710         | mmu-miR-710            | mmu-miR-29c            |
|                     | mmu-miR-711         | mmu-miR-711            | <b>mmu-miR-30a</b>     |
|                     | <b>mmu-miR-720</b>  | <b>mmu-miR-712</b>     | mmu-miR-30b            |
|                     | mmu-miR-721         | mmu-miR-720            | mmu-miR-30c            |
|                     | mmu-miR-877*        | mmu-miR-721            | <b>mmu-miR-30d</b>     |
|                     |                     | mmu-miR-762            | mmu-miR-30e            |
|                     |                     | <b>mmu-miR-92a</b>     | mmu-miR-365            |
|                     |                     | mmu-miR-93             | <b>mmu-miR-378</b>     |
|                     |                     |                        | mmu-miR-423-5p         |
|                     |                     |                        | <b>mmu-miR-451</b>     |
|                     |                     |                        | <b>mmu-miR-486</b>     |
|                     |                     |                        | <b>mmu-miR-574-5p</b>  |
|                     |                     |                        | mmu-miR-671-5p         |
|                     |                     |                        | mmu-miR-685            |
|                     |                     |                        | mmu-miR-689            |
|                     |                     |                        | mmu-miR-709            |
|                     |                     |                        | mmu-miR-712            |
|                     |                     |                        | mmu-miR-92a            |

The common miRNA species between treated (24 h after acetaminophen exposure) and control are listed in bold characters.

**Table S2. Detectable miRNAs by microarray among the 6 organs surveyed**

| miRNA           | Predominately expressed tissue |
|-----------------|--------------------------------|
| mmu-let-7a      | Brain                          |
| mmu-let-7b      | Lung                           |
| mmu-let-7c      | Brain                          |
| mmu-let-7d      | Brain                          |
| mmu-let-7e      | Brain                          |
| mmu-let-7f      | Brain                          |
| mmu-let-7 g     | Brain                          |
| mmu-let-7i      | Lung                           |
| mmu-miR-1       | Kidney                         |
| mmu-miR-100     | Brain                          |
| mmu-miR-101a    | Brain                          |
| mmu-miR-101b    | Liver                          |
| mmu-miR-103     | Brain                          |
| mmu-miR-107     | Brain                          |
| mmu-miR-10a     | Lung                           |
| mmu-miR-122     | Liver                          |
| mmu-miR-1224    | Spleen                         |
| mmu-miR-124     | Brain                          |
| mmu-miR-125b-5p | Brain                          |
| mmu-miR-126-3p  | Lung                           |
| mmu-miR-126-3p  | Lung                           |
| mmu-miR-127     | Brain                          |
| mmu-miR-128     | Brain                          |
| mmu-miR-129-3p  | Brain                          |
| mmu-miR-130a    | Lung                           |
| mmu-miR-132     | Brain                          |
| mmu-miR-133a    | Heart                          |
| mmu-miR-133a*   | Heart                          |
| mmu-miR-133b    | Heart                          |
| mmu-miR-136     | Brain                          |
| mmu-miR-137     | Brain                          |
| mmu-miR-139-5p  | Brain                          |
| mmu-miR-141     | Lung                           |
| mmu-miR-142-3p  | Spleen                         |
| mmu-miR-142-5p  | Spleen                         |
| mmu-miR-143     | Lung                           |
| mmu-miR-144     | Spleen                         |
| mmu-miR-146a    | Spleen                         |
| mmu-miR-148a    | Liver                          |
| mmu-miR-150     | Spleen                         |
| mmu-miR-151-5p  | Lung                           |
| mmu-miR-153     | Brain                          |
| mmu-miR-15a     | Liver                          |
| mmu-miR-15b     | Spleen                         |
| mmu-miR-16      | Spleen                         |
| mmu-miR-181a    | Brain                          |
| mmu-miR-192     | Liver                          |
| mmu-miR-193     | Liver                          |
| mmu-miR-194     | Liver                          |
| mmu-miR-195     | Lung                           |
| mmu-miR-199b    | Lung                           |
| mmu-miR-199b*   | Lung                           |
| mmu-miR-19b     | Spleen                         |
| mmu-miR-200a    | Lung                           |
| mmu-miR-200b    | Lung                           |
| mmu-miR-200c    | Lung                           |
| mmu-miR-204     | Brain                          |
| mmu-miR-208a    | Heart                          |
| mmu-miR-21      | Liver                          |
| mmu-miR-218     | Brain                          |
| mmu-miR-219     | Brain                          |
| mmu-miR-22      | Heart                          |
| mmu-miR-223     | Spleen                         |

| miRNA          | Predominately expressed tissue |
|----------------|--------------------------------|
| mmu-miR-23a    | Lung                           |
| mmu-miR-23b    | Lung                           |
| mmu-miR-24     | Lung                           |
| mmu-miR-26a    | Brain                          |
| mmu-miR-26b    | Lung                           |
| mmu-miR-27a    | Lung                           |
| mmu-miR-27b    | Lung                           |
| mmu-miR-29a    | Brain                          |
| mmu-miR-29b    | Brain                          |
| mmu-miR-29c    | Brain                          |
| mmu-miR-300    | Brain                          |
| mmu-miR-30a    | Lung                           |
| mmu-miR-30b    | Lung                           |
| mmu-miR-30c    | Lung                           |
| mmu-miR-30d    | Heart                          |
| mmu-miR-30e    | Heart                          |
| mmu-miR-338-3p | Brain                          |
| mmu-miR-34a    | Brain                          |
| mmu-miR-34b-5p | Lung                           |
| mmu-miR-34c    | Lung                           |
| mmu-miR-376a   | Brain                          |
| mmu-miR-378    | Heart                          |
| mmu-miR-434-3p | Brain                          |
| mmu-miR-451    | Spleen                         |
| mmu-miR-486    | Heart                          |
| mmu-miR-494    | Spleen                         |
| mmu-miR-497    | Lung                           |
| mmu-miR-499    | Kidney                         |
| mmu-miR-652    | Lung                           |
| mmu-miR-689    | Heart                          |
| mmu-miR-709    | Brain                          |
| mmu-miR-720    | Liver                          |
| mmu-miR-7a     | Brain                          |
| mmu-miR-9      | Brain                          |
| mmu-miR-9*     | Brain                          |
| mmu-miR-92a    | Spleen                         |
| mmu-miR-99a    | Heart                          |

The observed miRNAs are listed on the left and the predominant tissue expressing the miRNA is listed on the right.

**Table S3. Possible tissue origin of circulating miRNAs**

| Tissue                                 | Brain | Heart | Kidney | Liver | Lung | Spleen | Unknown | Total |
|----------------------------------------|-------|-------|--------|-------|------|--------|---------|-------|
| Control plasma samples                 | 6     | 7     | 0      | 2     | 5    | 5      | 18      | 43    |
| Acetaminophen-overdosed plasma samples | 9     | 8     | 1      | 7     | 9    | 6      | 13      | 53    |



**Table S4. The relative changes of selected miRNA species in plasma after acetaminophen exposure**

| Acetaminophen dose (n = 4) | Time after exposure, h | mir-486      | mir-133a     | mir-135*     | mir-101b    | mir-192     | mir-22       | mir-193     | mir-122      |
|----------------------------|------------------------|--------------|--------------|--------------|-------------|-------------|--------------|-------------|--------------|
| Control                    | 1                      | 0            | 0            | 0            | 0           | 0           | 0            | 0           | 0            |
| 75 mg/kg                   | 1                      | -0.74 ± 0.72 | 0.51 ± 1.18  | -0.18 ± 1.02 | 0.47 ± 0.82 | 0.47 ± 0.95 | 1.10 ± 1.91  | 0.27 ± 1.01 | -0.04 ± 1.97 |
| 150 mg/kg                  | 1                      | -0.58 ± 0.72 | 0.48 ± 1.92  | 0.87 ± 1.24  | 0.90 ± 1.08 | 2.46 ± 1.37 | 1.42 ± 1.52  | 1.07 ± 1.36 | 4.50 ± 1.96  |
| 300 mg/kg                  | 1                      | -0.08 ± 0.76 | -0.27 ± 1.22 | -0.10 ± 1.18 | 0.39 ± 1.00 | 1.16 ± 1.26 | 1.84 ± 1.75  | 0.00 ± 1.19 | 2.15 ± 2.07  |
| Control                    | 3                      | 0            | 0            | 0            | 0           | 0           | 0            | 0           | 0            |
| 75 mg/kg                   | 3                      | -0.40 ± 0.78 | -0.60 ± 1.69 | 1.22 ± 1.17  | 0.98 ± 1.21 | 1.38 ± 0.73 | -0.11 ± 2.83 | 0.75 ± 1.25 | 1.55 ± 1.08  |
| 150 mg/kg                  | 3                      | 0.14 ± 1.01  | 0.15 ± 1.57  | 0.49 ± 1.28  | 0.21 ± 1.41 | 3.86 ± 1.87 | -0.33 ± 2.92 | 0.98 ± 0.94 | 6.37 ± 2.28  |
| 300 mg/kg                  | 3                      | -0.64 ± 0.78 | -1.62 ± 1.63 | 3.03 ± 1.84  | 3.22 ± 2.20 | 5.75 ± 2.55 | 0.25 ± 2.68  | 0.97 ± 1.16 | 8.40 ± 2.71  |

For each treatment condition, time, and dose, plasma samples collected from 4 independent animals were compared. The relative changes based on QPCR results, reported on a log<sub>2</sub> scale, were determined by comparing the means between acetaminophen-exposed samples with its corresponding time point controls. The standard derivation of the sample sets are shown.
